# Supplementary material for: Superimposing Status Epilepticus on Neuron Subset-Specific PTEN Haploinsufficient and Wild Type Mice Results in Long-term Changes in Behavior
Source: PubMed Central journal article supplement (PMC5098193; doi:10.1038/srep36559), 2016-11-07
Supplement: srep36559-s1.pdf [file srep36559-s1.pdf]

**Supplemental figures for:**

**Superimposing Status Epilepticus on Neuron Subset-Specific PTEN  
Haploinsufficient and Wild Type Mice Results in Long-term Changes in Behavior**

Gregory D. Smith<sup>1</sup>, Jessika White<sup>2</sup>, and Joaquin N. Lugo<sup>\*1,2</sup>

<sup>1</sup>Institute of Biomedical Sciences, Baylor University, Waco, TX 76798, USA

<sup>2</sup>Department of Psychology and Neuroscience, Baylor University, Waco, TX 76798, USA

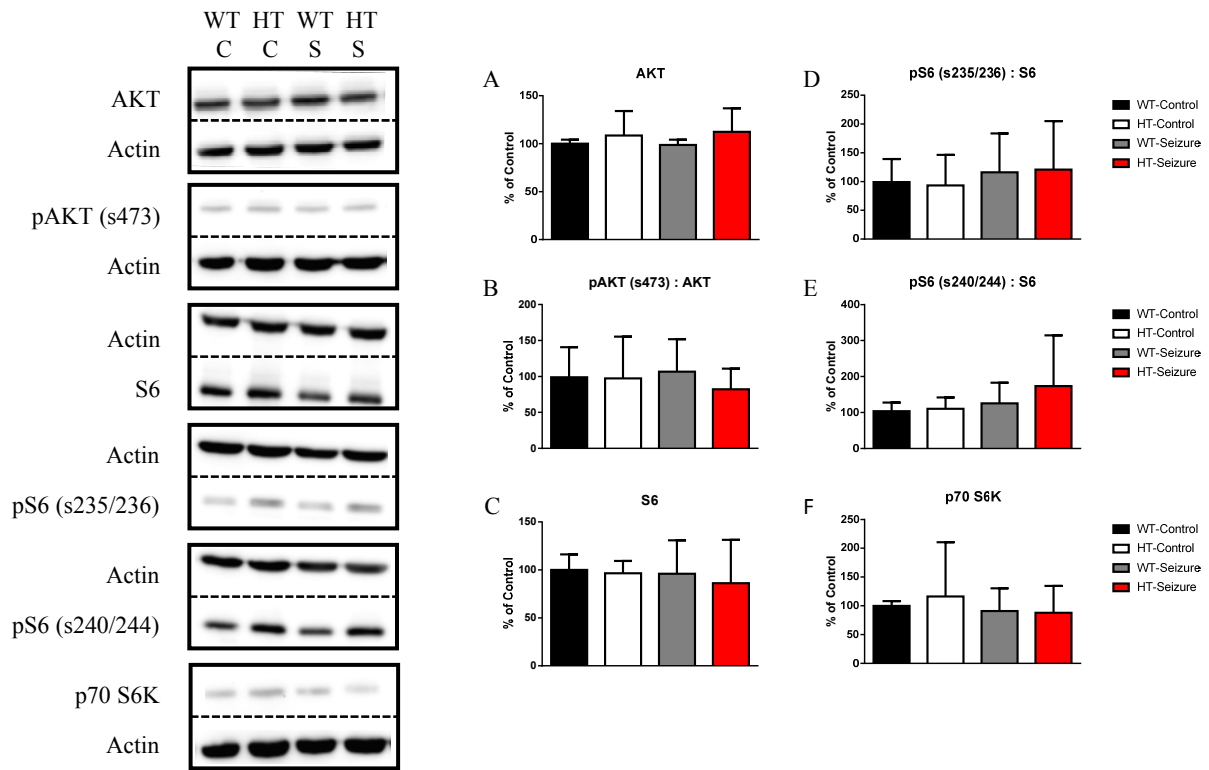

**Figure S1. Western blotting data for hippocampal total homogenate samples.**

Left: Image of the western blot. Right: Relative changes in protein concentration normalized to the loading constant and expressed as a percentage of the control group. All phosphorylated proteins are expressed as a percentage of phosphorylated protein to total protein concentration. **(A)** AKT. **(B)** pAKT (s473). **(C)** S6. **(D)** pS6 (s235/236). **(E)** pS6 (s240/244). **(F)** p70 S6K. WT-control n=8, HT-control n=8, WT-Seizure n=10, HT-Seizure n=10.

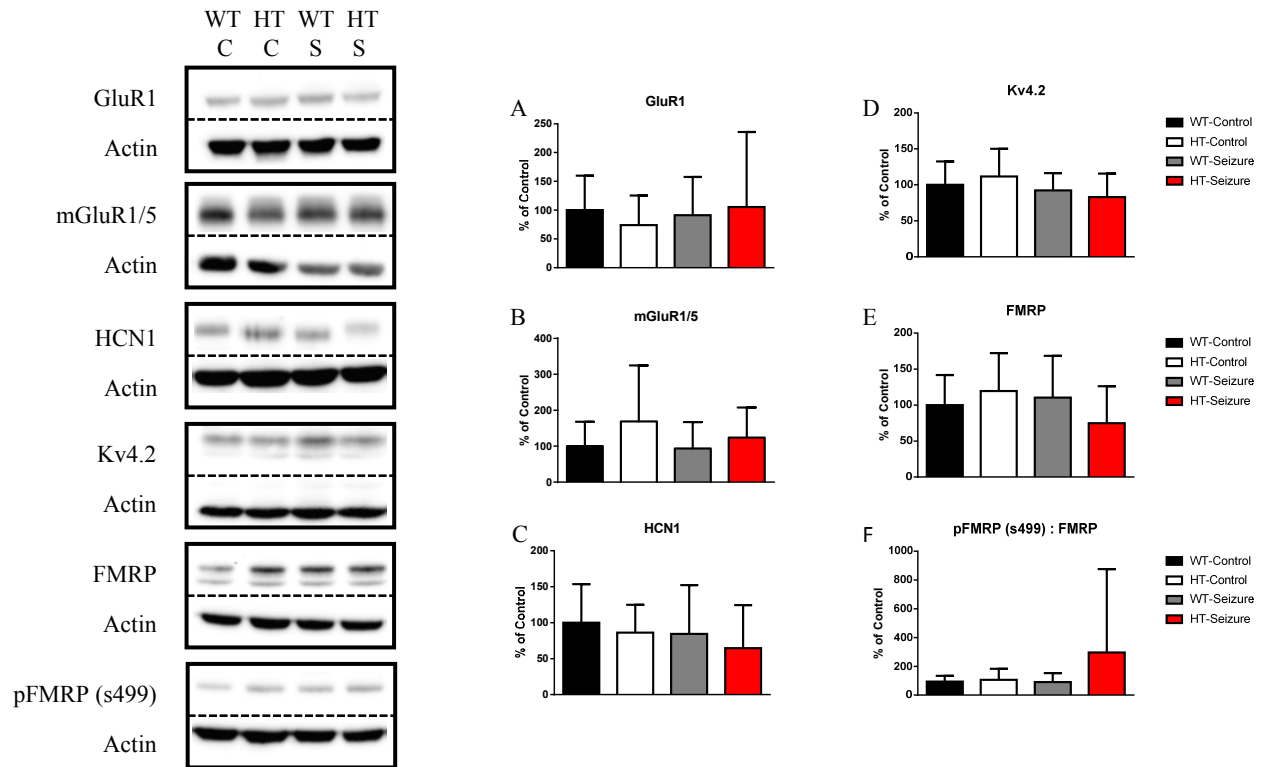

**Figure S2. Western blotting data for hippocampal synaptosome samples.** Left: Image of the western blot. Right: Relative changes in protein concentration normalized to the loading constant and expressed as a percentage of the control group. All phosphorylated proteins are expressed as a percentage of phosphorylated protein to total protein concentration. **(A)** GluR1. **(B)** mGluR1/5. **(C)** HCN1. **(D)** Kv4.2. **(E)** FMRP. **(F)** pFMRP (s499). WT-control n=8, HT-control n=8, WT-Seizure n=10, HT-Seizure n=10.

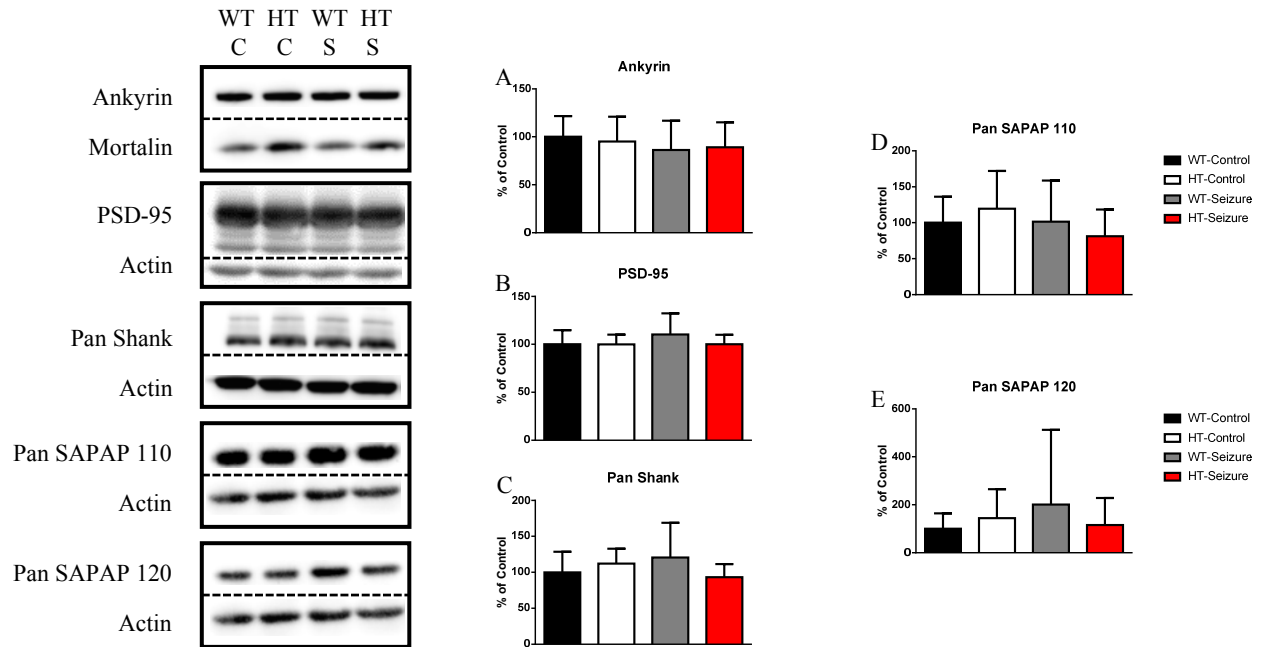

**Figure S3. Western blotting data for hippocampal synaptosome samples.** Left: Image of the western blot. Right: Relative changes in protein concentration normalized to the loading constant and expressed as a percentage of the control group. **(A)** Ankyrin. **(B)** PSD-95. **(C)** Pan Shank. **(D)** Pan SAPAP 110 kDa. **(E)** Pan SAPAP 120. WT-control n=8, HT-control n=8, WT-Seizure n=10, HT-Seizure n=10.
